# Supplementary material for: Bioactive Phytochemicals from Mercurialis spp. Used in Traditional Spanish Medicine
Source: PubMed Central journal article supplement (PMC6681364; doi:10.3390/plants8070193), 2019-06-28
Supplement: plants-08-00193-s001.pdf [file plants-08-00193-s001.pdf]

| <i>M. annua</i> | <i>M. perennis</i> | <i>M. tomentosa</i> | MOLECULE                                                     | CHEMICAL GROUP    |
|-----------------|--------------------|---------------------|--------------------------------------------------------------|-------------------|
| [1]             |                    |                     | Quercetin-3- <i>O</i> -rutinoside (Rutin)                    | FLAVONOIDS        |
| [1]             |                    |                     | Isorhamnetin-3- <i>O</i> -rutinoside (Narcissin)             |                   |
| [1]             |                    |                     | Quercetin-3- <i>O</i> -(2 <i>G</i> -glucosyl)-rutinoside     |                   |
| [1]             |                    |                     | Isorhamnetin-3- <i>O</i> -rutinoside-4'- <i>O</i> -glucoside |                   |
| [1]             |                    |                     | Isorhamnetin-3- <i>O</i> -rutinoside-7- <i>O</i> -glucoside  |                   |
|                 | [2]                |                     | Quercetin                                                    |                   |
|                 | [2]                |                     | Kaempferol                                                   |                   |
|                 |                    | [3]                 | Scopoletin                                                   |                   |
| [4]             |                    |                     | Pyridine-3-carbonitrile                                      | ALKALOIDS         |
| [4]             |                    |                     | Nicotinamide                                                 |                   |
| [4]             | [4,5]              | [3]                 | Hermidin                                                     |                   |
| [4]             | [4,5]              | [3]                 | Hermidin quinone                                             |                   |
| [4]             | [4,5]              |                     | <i>cis</i> -myrtanal                                         | CARBALDEHIDE      |
|                 | [5]                |                     | (-)- <i>trans</i> -myrtanol ( <i>trans</i> -MyrOH)           | TERPENES          |
| [4]             | [4,5]              |                     | <i>cis</i> -myrtanol                                         |                   |
|                 | [5]                |                     | <i>trans</i> -phytol                                         |                   |
|                 | [5]                |                     | Squalene                                                     |                   |
|                 | [5]                |                     | $\beta$ -carotene                                            |                   |
|                 | [5]                |                     | Phytadiene isomers                                           |                   |
|                 | [5]                |                     | Nonacosane                                                   | ALKANE            |
|                 | [5]                |                     | 4-Methoxyphenol (Mequinol, 4-Hydroxyanisole)                 | AROMATIC ALCOHOLS |
|                 | [5]                |                     | 3,4-Dimethoxyphenol                                          |                   |
|                 |                    | [3]                 | 4-Hydroxybenzaldehyde                                        |                   |
|                 |                    | [3]                 | 4-Hydroxybenzotrile                                          |                   |
|                 |                    | [3]                 | 4-Hydroxyacetophenone                                        |                   |
|                 |                    | [3]                 | Ethyl 4-hydroxybenzoate                                      |                   |
|                 |                    | [3]                 | Ethyl (E)-2-hydroxycinnamate                                 |                   |
|                 |                    | [3]                 | Methyl (E)-4-hydroxycinnamate                                |                   |
|                 |                    | [3]                 | Ethyl (E)-4-hydroxycinnamate                                 |                   |
|                 |                    | [3]                 | Sinapyl alcohol                                              |                   |
| [4]             | [4,5]              |                     | Benzyl Alcohol                                               |                   |
| [4]             | [4,5]              |                     | 2-Phenylethyl alcohol (2-Phenylethanol)                      |                   |
| [4]             | [4]                |                     | N-ethylaniline                                               |                   |

|     |         |     |                                                                                 |                           |
|-----|---------|-----|---------------------------------------------------------------------------------|---------------------------|
| [4] | [4]     |     | 6,6-dimethylbicyclo[3.1.1]heptan-2-one ( $\beta$ -pinone, nopinone)             |                           |
| [4] | [2,4,5] | [3] | <i>n</i> -Alkylresorcinols                                                      | <b>PHENOLIC LIPIDS</b>    |
|     | [5]     |     | $\alpha,\gamma$ , $\delta$ -Tocopherol                                          | <b>TOCOPHEROLS</b>        |
|     |         | [3] | Coniferyl alcohol                                                               | <b>PHENYLPROPANOIDS</b>   |
|     | [5]     |     | Campesterol                                                                     | <b>STEROIDS</b>           |
|     | [5]     |     | Stigmasterol                                                                    |                           |
|     | [5]     |     | $\beta$ -sitosterol                                                             |                           |
|     | [5]     |     | Cycloartenol                                                                    |                           |
|     | [5]     | [3] | $\alpha$ -Linolenic acid                                                        | <b>FATTY ACIDS</b>        |
|     | [5]     |     | Linoleic acid                                                                   |                           |
|     | [5]     |     | <i>cis</i> -Oleic acid                                                          |                           |
|     | [2,5]   | [3] | Palmitic acid                                                                   |                           |
|     | [5]     |     | Stearic acid                                                                    |                           |
|     | [5]     |     | Linolenic acid ethyl ester (Linolen-E)                                          |                           |
|     | [5]     |     | <i>trans</i> -Oleic acid                                                        |                           |
| [4] | [2,4]   |     | Phaselic acid (2- <i>O</i> -( <i>E</i> )-caffeoyl malic acid)                   | <b>DEPSIDES</b>           |
|     | [2,4]   |     | Mercurialis acid ((-)-(2 <i>R</i> )-2-[( <i>E</i> )-caffeoyloxy]-glutaric acid) |                           |
|     | [2]     |     | <i>p</i> -Coumaric acid                                                         | <b>PHENOLIC ACIDS</b>     |
|     | [2]     |     | Ferulic acid                                                                    |                           |
|     | [2]     |     | Caffeic acid                                                                    |                           |
|     |         | [3] | Vanillic acid                                                                   |                           |
|     | [2]     |     | Caffeoyl glucarate                                                              | <b>SUGAR ACIDS</b>        |
|     | [2]     |     | <i>p</i> -Coumaroyl glucarate                                                   |                           |
|     | [2]     |     | Feruloyl glucarate                                                              |                           |
|     | [2]     |     | Glucaric acid                                                                   |                           |
|     | [2]     |     | Glyceric acid                                                                   |                           |
|     | [2]     |     | Malonic acid                                                                    | <b>DICARBOXYLIC ACIDS</b> |
|     | [2]     |     | Succinic acid                                                                   |                           |
|     | [2]     |     | Fumaric acid                                                                    |                           |
|     | [2]     |     | Malic acid                                                                      |                           |
|     | [2]     |     | 2-Hydroxyglutaric acid                                                          |                           |
|     | [2]     |     | Citric acid                                                                     | <b>ORGANIC ACID</b>       |
|     | [2]     |     | Arabinoic acid-1,4-lactone                                                      | <b>LACTONE</b>            |

### **Bibliography**

1. Aquino, R.; Behar, I.; D'agostino, M.; De. Simone, F.; Schettino, O.; Pizza, C. Phytochemical investigation on *Mercurialis annua*. *Biochem. Syst. Ecol.* **1987**, *15*, 667–669.
2. Lorenz, P.; Stintzing, F.C.; Meyer, U.; Conrad, J.; Berger, M.; Duckstein, S.; Bertrams, J. Investigations into the Phenolic Constituents of Dog's Mercury (*Mercurialis perennis* L.) by LC-MS/MS and GC-MS analyses. *Phytochem. Anal.* **2011**, *23*, 60–71.
3. Lorenz, P.; Heinrich, M.; Conrad, J.; Heller, A.; Stintzing, F.C.; Kammerer, D.R. Comprehensive Characterisation of *n*-Alkylresorcinols and Other Lipid Constituents of *Mercurialis tomentosa* L. from Alicante, Spain. *Chem. Biodivers.* **2017**, *14*.

4. Lorenz, P.; Duckstein, S.; Conrad, J.; Knödler, M.; Meyer, U.; Stintzing, F.C. An approach to the chemotaxonomic differentiation of two European Dog's mercury species: *Mercurialis annua* L. and *M. perennis* L. *Chem. Biodivers.* **2012**, *9*, 282–297.
5. Lorenz, P.; Hradecky, M.; Berger, M.; Bertrams, J.; Meyer, U.; Stintzing, F.C. Lipophilic constituents from aerial and root parts of *Mercurialis perennis* L. *Phytochem. Anal.* **2010**, *21*, 234–245.
